## Danish dementia and excitatory transmission

### ▪ **Familial Danish dementia young Knock-in rats expressing humanized APP and human A $\beta$ show impaired pre and postsynaptic glutamatergic transmission**

▪ Tao Yin<sup>1</sup>, Wen Yao<sup>1,2</sup>, Kelly A. Norris<sup>1</sup> & Luciano D'Adamio<sup>1\*</sup>

<sup>1</sup>Department of Pharmacology, Physiology & Neuroscience, Brain Health Institute, New Jersey Medical School, Rutgers, The State University of New Jersey, 205 South Orange Ave, Newark, NJ, 07103, USA

<sup>2</sup>Present address: Biomedical Research Center, Southern Medical University, 1023 South Shatai Road, Guangzhou, Guangdong, 510515, China.

\*To whom correspondence should be addressed: [luciano.dadamio@rutgers.edu](mailto:luciano.dadamio@rutgers.edu)

Running title: Danish dementia and excitatory transmission

**Keywords:** Familial Danish Dementia, Amyloid precursor protein (APP), Amyloid  $\beta$ , neurodegeneration, synaptic plasticity, rat, animal model, glutamate, Familial Danish Dementia, BRI2, *Integral membrane protein 2B (ITM2b)*

#### ABSTRACT

Familial British and Danish dementia (FBD and FDD) are two neurodegenerative disorders caused by mutations in the *Integral membrane protein 2B (ITM2b)*. BRI2, the protein encoded by *ITM2b*, tunes excitatory synaptic transmission at both pre- and post-synaptic terminus. Too, BRI2 interacts with and modulates proteolytic processing of Amyloid- $\beta$  precursor Protein (APP), whose mutations cause familial forms of Alzheimer disease (FAD). To study pathogenic mechanism triggered by the Danish mutation we generated rats carrying the Danish mutation into the rat *Itm2b* gene (*Itm2b<sup>D</sup>* rats). Given the BRI2/APP interaction and the widely accepted relevance of human A $\beta$ , a proteolytic product of APP, to AD, *Itm2b<sup>D</sup>* rats were engineered to express two humanized *App* alleles, to produce human A $\beta$ . Here, we studied young *Itm2b<sup>D</sup>* rats to investigate early pathogenic changes. We found that peri-adolescent *Itm2b<sup>D</sup>* rats present subtle changes in human A $\beta$  levels along with decreased spontaneous glutamate release and AMPAR-mediated responses but increased short-term

synaptic facilitation in the hippocampal Schaeffer-collateral pathway. These changes are like those observed in adult mice producing rodent A $\beta$  and carrying either the Danish or British mutations into the mouse *Itm2b* gene. Collectively, the data show that the pathogenic Danish mutation alters the physiological function of BRI2 at glutamatergic synapses; these functional alterations are detected across species and occur early in life. Future studies will be needed to determine whether this phenomenon represents an early pathogenic event in human dementia.

#### INTRODUCTION

Model organisms that reproduce the pathogenesis of human diseases are useful to dissect disease mechanisms, identify therapeutic targets and test therapeutic strategies. Because genetic manipulation has been easier in mice, mice have overtaken rats as the major rodent-based model organism in neurodegeneration research. Thus, to study FDD and FBD, fifteen years ago we generated mice carrying the pathogenic Danish and British dementia mutations (*Itm2b<sup>D</sup>* and *Itm2b<sup>B</sup>*

## Danish dementia and excitatory transmission

72 mice) into the *Itm2b* mouse gene (1-3). We  
73 choose a knock in (KI) approach rather than  
74 the more common transgenic overexpression  
75 approach for several reasons. KIs mimic the  
76 genetic of FDD and FBD and make no  
77 assumption about pathogenic mechanisms  
78 (except the unbiased genetic one), while the  
79 transgenic approach aims to reproduce  
80 pathology (plaques, Neurofibrillary tangles  
81 (NFTs), etc.), under the assumption that this  
82 “pathology” is pathogenic. In KI models,  
83 expression of mutant genes is controlled by  
84 endogenous regulatory elements, avoiding  
85 issues related to over-expression of disease-  
86 proteins in a non-physiological quantitative-  
87 spatial-temporal manner. Finally, potential  
88 confounding “insertion” effects of transgenes  
89 are avoided.

90 Because rats are better suited to study  
91 neurodegenerative diseases, we took  
92 advantage of recent developments in gene-  
93 editing technologies and introduced the  
94 familial Danish mutation into the genomic  
95 *Itm2b* rat locus (*Itm2b<sup>D</sup>* rats). The rat was the  
96 organism of choice for most behavioral,  
97 memory and cognitive research -which is  
98 critical when studying neurodegenerative  
99 diseases- because physiological processes are  
100 similar in rats and humans and the rat is an  
101 intelligent and quick learner (4-7).

102 Several procedures that are important in  
103 dementia research are more easily performed  
104 in rats as compared to mice due to the larger  
105 size of the rat brain. Cannulas -to administer  
106 drugs, biologics, viruses etc.- and micro-  
107 dialysis probes -for sampling extracellular  
108 brain levels of neurotransmitters, A $\beta$ , soluble  
109 tau etc.- can be accurately directed to  
110 individual brain regions, causing less damage  
111 and increasing specificity. *In vivo* brain  
112 imaging techniques, such as MRI (8) and PET  
113 (9-11), can assess the extent and course of  
114 neurodegeneration with better spatial  
115 resolution in rats. Moreover, rats are large  
116 enough for convenient *in vivo*  
117 electrophysiological recordings or serial  
118 sampling of cerebrospinal fluid for detection  
119 of biomarkers.

120 Finally, gene-expression differences  
121 suggest that rats may be advantageous model

122 of neurodegenerative diseases over mice. For  
123 example, alternative splicing of *tau* (12-15),  
124 which forms NFTs and is mutated in  
125 Frontotemporal Dementia (16-23), leads to  
126 expression of tau isoforms with three or four  
127 microtubule binding domains (3R and 4R,  
128 respectively). Adult human and rat brains  
129 express both 3R and 4R tau isoforms (24): in  
130 contrast, adult mouse brains express only 4R  
131 tau(25), suggesting that the rat may be a better  
132 model organism for dementias with tauopathy,  
133 such as FDD and FBD.

134 BRI2 physically interacts with and  
135 modulates processing of APP, which bears  
136 relevance to AD pathogenesis (26-30). In  
137 addition, APP processing mediates LTP and  
138 memory deficits of Danish and British KI  
139 mice (31-36). Aggregated forms of A $\beta$ , a  
140 product of APP processing, are by and large  
141 considered the main pathogenic molecule in  
142 AD. Rat and human APP differ by 3 amino-  
143 acids in the A $\beta$  region: given that human A $\beta$   
144 are believed to have higher propensity to form  
145 toxic A $\beta$  species as compared to rodent A $\beta$ ,  
146 we produced rats carrying the humanized A $\beta$   
147 sequence (*App<sup>h</sup>* rats) (37,38). Thus, to study  
148 possible interactions between the Danish  
149 mutation and human A $\beta$ , *Itm2b<sup>D</sup>* rats were  
150 backcrossed to *App<sup>h</sup>* rats. Hence, all rats used  
151 in this study produce human and not rodent  
152 A $\beta$  species.

153 Here, we studied peri-adolescent *Itm2b<sup>D</sup>*  
154 rats, with the purpose of investigating early  
155 dysfunctions that may underlie initial  
156 pathogenic mechanisms leading to dementia  
157 later in life.

## 158 RESULTS

### 159 Generation of *Itm2b<sup>D</sup>* KI rats carrying 160 humanized *App<sup>h</sup>* alleles.

161 The knock-in founder F0-*Itm2b<sup>D</sup>* rat,  
162 which is carrying FDD mutation on *Itm2b* rat  
163 gene, was generated by CRISPR/Cas-mediated  
164 genome engineering as described in  
165 Experimental Procedures and Supporting  
166 Information. The F0-*Itm2b<sup>D</sup>* rat, which is a  
167 chimera for the *Itm2b* gene, was crossed to  
168 WT (*Itm2b<sup>w/w</sup>*) Long-Evans rats to generate  
169 F1-*Itm2b<sup>D/w</sup>* rats. F1-*Itm2b<sup>D/w</sup>* rats were crossed  
170 to WT Long-Evans to generate F2-*Itm2b<sup>D/w</sup>*  
171 rats. These crossing were repeated three more

## Danish dementia and excitatory transmission

172 times to obtain F5-*Itm2b*<sup>D/w</sup> rats. The  
173 probability that F5 rats carry unidentified off-  
174 target mutations (except those, if present, on  
175 Chr. 15) is ~1.5625%. Male and female F5-  
176 *Itm2b*<sup>D/w</sup> rats were crossed to obtain *Itm2b*<sup>D/w</sup>,  
177 *Itm2b*<sup>D/D</sup> and *Itm2b*<sup>w/w</sup> rats.

178 The FDD mutation consist of a 10  
179 nucleotides duplication one codon before the  
180 normal stop codon (39). This produces a  
181 frameshift in the BRI2 sequence generating a  
182 precursor protein 11 amino acids larger-than-  
183 normal (Figure 1A). To verify that the Danish  
184 mutation was correctly inserted into *Itm2b*  
185 exon 6, we amplified by PCR the *Itm2b* gene  
186 exon 6 *Itm2b*<sup>D/w</sup>, *Itm2b*<sup>D/D</sup> and *Itm2b*<sup>w/w</sup> rats.  
187 Sequencing of the PCR products shows that  
188 the Danish mutation was correctly inserted in  
189 the *Itm2b* gene exon 6 (Figure 1B) and  
190 encoded for the COOH-terminus of the Danish  
191 BRI2 mutant. When we generated FDD KI  
192 mice, we humanized the mouse COOH-  
193 terminal region of BRI2 by introducing an  
194 alanine (A) was substituted for threonine (T)  
195 at codon 250 (3). Since that humanization did  
196 not result into deposition of ADan peptides in  
197 amyloid plaques in KI mice (3), that  
198 modification was not repeated in rats.

199 To generate *Itm2b*<sup>D/w</sup>, *Itm2b*<sup>D/D</sup> and  
200 *Itm2b*<sup>w/w</sup> rats on a background in which rat *App*  
201 has a humanized A $\beta$  region, *Itm2b*<sup>D/w</sup> and  
202 *App*<sup>h/h</sup> rats were crossed to generate  
203 *Itm2b*<sup>D/w</sup>; *App*<sup>h/w</sup> rats. The *App*<sup>w</sup> allele was  
204 removed in subsequent crosses. Henceforth,  
205 *Itm2b*<sup>D/D</sup>, *Itm2b*<sup>D/w</sup> and *Itm2b*<sup>w/w</sup> rats used in  
206 this study have an *App*<sup>h/h</sup> background and  
207 produce human and not rodent A $\beta$  species.

208 To determine whether *Itm2b* expression is  
209 disrupted by the introduced mutations, we  
210 examined *Itm2b* mRNA levels in p21 *Itm2b*<sup>D/D</sup>  
211 and *Itm2b*<sup>w/w</sup> rats by standard RNA-Seq  
212 analysis on total brain RNA. The mRNA  
213 expression of *Itm2b* shows no significant  
214 difference between *Itm2b*<sup>D/D</sup> and *Itm2b*<sup>w/w</sup> rats  
215 (Figure 1C).

216 **The *Itm2b*<sup>D</sup> allele encodes for a longer**  
217 **Bri2 precursor protein (Bri2-ADan) that**  
218 **accumulates in primary neurons.**

219 BRI2 is a type II membrane protein that is  
220 synthesized as an immature precursor  
221 (imBRI2). imBRI2 is cleaved at the COOH-

222 terminus by proprotein convertase to produce  
223 the NH<sub>2</sub>-terminal mature BRI2 (mBRI2) and  
224 the 23 amino acid-long COOH-terminal  
225 peptide called Bri23 (40). As noted above, in  
226 the Danish patients, a frameshift caused by a  
227 10 nucleotides duplication 5' to the stop codon  
228 leads to the synthesis of a BRI2 precursor  
229 protein 11 amino acids larger-than-normal  
230 (39). Convertase-mediated cleavage of  
231 immature Danish BRI2 generates a WT-like  
232 mBRI2 and a 34 amino acid long peptide  
233 called ADan, which co-deposits with A $\beta$   
234 species in amyloid fibrils in patients. For  
235 clarity, we will refer to the wild type imBri2  
236 as Bri2-Bri23, and to the Danish mutant  
237 imBri2 as Bri2-ADan.

238 To determine whether the *Itm2b*<sup>D</sup> allele  
239 codes for Bri2-ADan we examined Bri2  
240 expression in total neuronal lysates isolated  
241 from male and female 2 months old *Itm2b*<sup>D/w</sup>,  
242 *Itm2b*<sup>D/D</sup> and *Itm2b*<sup>w/w</sup> rats. However, the Bri2  
243 antibody tested identified many non-specific  
244 bands (Figure S1), making a rigorous  
245 assessment of Bri2 expression in rat brains  
246 challenging.

247 Analysis of mouse *Itm2b*<sup>w/w</sup> and *Itm2b*<sup>D/D</sup>  
248 primary neurons showed that the mBri2/Bri2-  
249 Bri23 ratio in *Itm2b*<sup>w/w</sup> primary neurons was  
250 significantly higher than the mBri2/Bri2-  
251 ADan ratio in *Itm2b*<sup>D/D</sup> primary neurons (41).  
252 In addition, lysosomal inhibition caused  
253 accumulation of mBri2 but not Bri2-Bri23 in  
254 *Itm2b*<sup>w/w</sup> primary neurons; in contrast, both  
255 mBri2 and Bri2-ADan accumulated in  
256 *Itm2b*<sup>D/D</sup> primary neurons (41). These  
257 observations indicated that the Danish  
258 mutation reduced maturation of the mutant  
259 precursor Bri2 in mouse neurons. Based on  
260 these observations, we probed whether  
261 primary neurons could be used to assess  
262 mBri2, Bri2-Bri23 and Bri2-ADan expression  
263 in KI rats. Primary neurons are a simpler  
264 system compared to total brain; this, *per se*,  
265 may reduce the number of non-specific bands  
266 identified by anti-Bri2 antibodies. Moreover,  
267 inhibition of lysosome-mediated degradation  
268 of Bri2 species in primary neurons may help  
269 identify specific Bri2 molecules. Thus,  
270 primary neurons derived from *Itm2b*<sup>w/w</sup> and  
271 *Itm2b*<sup>D/D</sup> rat were treated with the lysosomal  
272 inhibitor chloroquine and analyzed by Western

## Danish dementia and excitatory transmission

273 blot. The anti-Bri2 antibody identified a band  
274 of ~34 kDa in all samples, which was  
275 increased by chloroquine (Figure 2A and 2C).  
276 These observations are consistent with the ~34  
277 kDa corresponding to mBri2. A second band  
278 of ~36 kDa was detected in *Itm2b<sup>w/w</sup>* primary  
279 neurons (Figure 2A). In contrast, a slightly  
280 larger second band (~37 kDa) that was  
281 increased by chloroquine treatment, was  
282 detected in *Itm2b<sup>D/D</sup>* primary neurons (Figure  
283 2A and 2C). These observations are consistent  
284 with the ~36 kDa and ~37 kDa bands  
285 corresponding to Bri2-Bri23 and Bri2-ADan,  
286 respectively.

287 Without treatment, the levels of Bri2-  
288 ADan in *Itm2b<sup>D/D</sup>* primary neurons were  
289 significantly higher than the levels of Bri2-  
290 Bri23 in *Itm2b<sup>w/w</sup>* primary neurons (Figure 2A  
291 and 2C) and the mBri2/Bri2-Bri23 ratio in  
292 *Itm2b<sup>w/w</sup>* primary neurons was significantly  
293 higher than the mBri2/Bri2-ADan ratio in  
294 *Itm2b<sup>D/D</sup>* primary neurons (Figure 2A and 2C).  
295 Chloroquine significantly reduced the LC3A  
296 I/LC3A II and LC3B I/LC3B II ratios (Figure  
297 2B and 2C), confirming inhibition of  
298 lysosome-mediated degradation.

### 299 **Subtle increase in A $\beta$ 42 levels in young** 300 ***Itm2b<sup>D</sup>* KI rats.**

301 Sequential processing of APP by  $\alpha$ -/ $\gamma$ -  
302 secretase and  $\beta$ -/ $\gamma$ -secretase generate the  
303 following APP metabolites: sAPP $\beta$ , sAPP $\alpha$ ,  
304  $\beta$ -CTF,  $\alpha$ -CTF, AID/AICD, P3 and A $\beta$ .  
305 Since BRI2 interacts with APP and  
306 modulates APP processing by  $\alpha$ -,  $\beta$ - and  $\gamma$ -  
307 secretase (26-30), we determined the steady-  
308 state levels of several of these APP  
309 metabolites in the central nervous system  
310 (CNS) of young male and female *Itm2b<sup>D</sup>* KI  
311 rats. Full length APP,  $\alpha$ -CTF and  $\beta$ -CTF  
312 were measured by Western blot: soluble  
313 APPs (sAPP $\alpha$ /sAPP $\beta$ ) were detected by  
314 ELISA, and human A $\beta$  species (A $\beta$ 38, A $\beta$ 40,  
315 A $\beta$ 42 and A $\beta$ 43) were detected by human A $\beta$   
316 specific-ELISA. These measurements have  
317 previously been used for other KI rats  
318 generated in our lab (38,42-44).

319 Levels of full-length APP, CTFs, A $\beta$ 38,  
320 A $\beta$ 40, A $\beta$ 43, sAPP $\alpha$  and sAPP $\beta$  were  
321 unchanged in 8 weeks old *Itm2b<sup>D/w</sup>*, *Itm2b<sup>D/D</sup>*  
322 and *Itm2b<sup>w/w</sup>* rats (Figure 3A-C), nor was the  
323 A $\beta$ 43/A $\beta$ 42 ratio altered (Figure 3C). In

324 contrast, there was a slight but significant  
325 increase in A $\beta$ 42 as well as the A $\beta$ 42/A $\beta$ 40  
326 ratio in *Itm2b<sup>D/D</sup>* compared to *Itm2b<sup>w/w</sup>* rats  
327 (Figure 3C). Small but statistically  
328 significant decreases in both A $\beta$ 43 and  
329 A $\beta$ 43/A $\beta$ 42 ratio were evident in *Itm2b<sup>D/D</sup>* as  
330 compared to *Itm2b<sup>w/w</sup>* rats (Figure 3C).  
331 Overall, these data indicate a gene dosage-  
332 dependent minor increase in steady-state  
333 levels of A $\beta$ 42, and decrease in A $\beta$ 43, in  
334 peri-adolescent *Itm2b<sup>D</sup>* rats. Analysis of older  
335 rats will be needed to determine whether the  
336 Danish mutation in *Itm2b* alters APP  
337 processing in KI rats and whether these  
338 alterations may more robustly change the  
339 steady-state levels of APP metabolites with  
340 aging.

341 It has been postulated that toxic forms of  
342 A $\beta$  are oligomeric (45). Thus, we tested  
343 whether toxic oligomers are augmented in  
344 peri-adolescent *Itm2b<sup>D</sup>* rats. To this end, we  
345 used the prefibrillar oligomer-specific  
346 antibody A11 to perform dot blots (46). We  
347 found no evidence supporting an increase in  
348 neurotoxic brain oligomer levels in peri-  
349 adolescent *Itm2b<sup>D/w</sup>* and *Itm2b<sup>D/D</sup>* rats as  
350 compared with *Itm2b<sup>w/w</sup>* rats (Figure 4).  
351 However, A $\beta$  oligomers appeared to be  
352 significantly increased in *Itm2b<sup>D/w</sup>* rats  
353 compared to *Itm2b<sup>D/D</sup>* animals (Figure 4).  
354 Analysis of older rats will be needed to  
355 clarify the relevance of this odd observation.

### 356 **Glutamatergic synaptic transmission at** 357 **hippocampal SC-CA3>CA1 synapses is** 358 **impaired in peri-adolescent *Itm2b<sup>D</sup>* rats.**

359 Bri2 modulates glutamatergic synaptic  
360 transmission at both pre- and post-synaptic  
361 termini of Schaeffer-collateral pathway (SC)-  
362 CA3>CA1 synapses (47). This function is  
363 compromised in both adult *Itm2b<sup>D</sup>* and *Itm2b<sup>B</sup>*  
364 KI mice (41). Here, analyzed glutamatergic  
365 transmission at SC-CA3>CA1 synapses in  
366 young peri-adolescent *Itm2b<sup>D</sup>* male and  
367 female rats. First, we analyzed miniature  
368 excitatory postsynaptic currents (mEPSC),  
369 the frequency of which is determined, in part,  
370 by the probability of release (*Pr*) of  
371 glutamatergic synaptic vesicles release (48).  
372 Thus, mEPSC frequency is regulated mostly  
373 by pre-synaptic mechanisms: As shown in  
374 Figure 5A, B,C, the Danish *Itm2b* mutation



## Danish dementia and excitatory transmission

375 caused a significant reduction in the  
376 frequency of mEPSC: this reduction is gene-  
377 dosage dependent (*Itm2b<sup>w/w</sup>* vs. *Itm2b<sup>D/w</sup>*,  
378  $P=0.003$ ; *Itm2b<sup>w/w</sup>* vs. *Itm2b<sup>D/D</sup>*,  $P<0.0001$ ;  
379 *Itm2b<sup>D/w</sup>* vs. *Itm2b<sup>D/D</sup>*,  $P=0.0051$ ) and suggests  
380 a decrease in *Pr* of glutamatergic synaptic  
381 vesicles.

382 The amplitude of mEPSC is instead  
383 dependent on post-synaptic AMPA receptor  
384 ( $\alpha$ -amino-3-hydroxy-5-methyl-4-isoxazole  
385 propionic acid-receptor, AMPAR) responses.  
386 AMPAR-mediated mEPSC responses  
387 amplitude was also significantly decreased in  
388 *Itm2b<sup>D</sup>* rats (Figure 5A, D, E, G). Also in this  
389 case, the reduction is gene-dosage dependent  
390 (*Itm2b<sup>w/w</sup>* vs. *Itm2b<sup>D/w</sup>*,  $P=0.0016$ ; *Itm2b<sup>w/w</sup>* vs.  
391 *Itm2b<sup>D/D</sup>*,  $P=0.0005$ ). Decay time of mEPSC  
392 was not significantly affected in *Itm2b<sup>D</sup>* rats  
393 compared to littermate controls (Figure 5A,  
394 F, G).

395 Since mEPSCs AMPAR-mediated  
396 responses are reduced in amplitude, we  
397 measured the AMPA/NMDA ratio in evoked  
398 responses. Consistent with the hypothesis that  
399 the Danish *Itm2b* mutation impairs AMPAR-  
400 mediated responses, the AMPA/NMDA ratio  
401 was reduced in Danish KI rats (Figure 5H).  
402 This difference was statistically different  
403 only between *Itm2b<sup>w/w</sup>* and *Itm2b<sup>D/D</sup>* rats, with  
404 *Itm2b<sup>D/w</sup>* rats showing an intermedia  
405 phenotype.

406 Finally, we examined the effect of the  
407 pathogenic Danish mutation on paired-pulse  
408 facilitation (PPF). PPF is a form of short-term  
409 synaptic plasticity that is in part determined  
410 by changes in *Pr* of glutamatergic synaptic  
411 vesicles (48)(41). Facilitation at both 50ms  
412 and 200ms interstimulus interval (ISI), was  
413 significantly increased in *Itm2b<sup>D/D</sup>* (Figure  
414 5I). Even in this case the changes were gene-  
415 dosage-dependent (50ms ISI: *Itm2b<sup>w/w</sup>* vs.  
416 *Itm2b<sup>D/D</sup>*,  $P<0.0001$ ; *Itm2b<sup>D/w</sup>* vs. *Itm2b<sup>D/D</sup>*,  
417  $P=0.0031$ ; 200ms ISI: *Itm2b<sup>w/w</sup>* vs. *Itm2b<sup>D/D</sup>*,  
418  $P=0.0205$ ). Interestingly, also an increase in  
419 PPF is consistent with a decrease in *Pr*, just  
420 like a decrease in mEPSC frequency. Overall,  
421 our data indicate that the pathogenic Danish  
422 *Itm2b* mutation alters glutamatergic synaptic  
423 transmission at excitatory hippocampal SC-  
424 CA3>CA1 synapses in peri-adolescent KI

425 rats. These alterations are like those seen in  
426 *Itm2b* KO and *Itm2b<sup>D</sup>/Itm2b<sup>B</sup>* KI adult mice.

## 427 DISCUSSION

429 The choice of the genetic approach and  
430 the model organisms used to model human  
431 diseases have major implications on the  
432 phenotypic expression of disease-associated  
433 genetic mutations. For the last 13 years, our  
434 laboratory has modeled AD and AD-like  
435 neurodegenerative disorders in mice, using a  
436 KI approach (3,49-52). The KI approach was  
437 preferred because it generates models  
438 genetically faithful to human diseases and  
439 make no preconceived assumption about  
440 pathogenic mechanisms (except the unbiased  
441 genetic one). We have recently extended our  
442 KI modeling of familial and sporadic forms of  
443 AD and AD-related disorders to rats  
444 (38,42,44,53,54), because the rat is better  
445 suited for behavioral tests and other  
446 procedures that are important when studying  
447 neurodegenerative diseases. In addition, gene-  
448 expression differences suggest that rats may  
449 be advantageous model of neurodegenerative  
450 diseases over mice. Alternative splicing of  
451 *Mapt* (12-15), which forms NFTs and is  
452 mutated in Frontotemporal Dementia (16-23),  
453 leads to expression of tau isoforms with three  
454 or four microtubule binding domains (3R and  
455 4R, respectively). Adult human and rat brains  
456 express both 3R and 4R tau isoforms (24): in  
457 contrast, adult mouse brains express only 4R  
458 tau (25), suggesting that the rat may be a  
459 better model organism for dementias with  
460 tauopathy.

461 To explore early dysfunctions that may  
462 underlie initial mechanisms leading to  
463 dementia, we studied young KI rats carrying  
464 the *Itm2b<sup>D</sup>* Familial Danish dementia  
465 mutation. Consistent with the findings in  
466 *Itm2b<sup>D/D</sup>* mouse KIs (41), we found that Bri2-  
467 ADan maturation is altered and accumulates  
468 in *Itm2b<sup>D/D</sup>* primary neurons (Figure 2).  
469 Analysis of APP metabolism in peri-  
470 adolescent *Itm2b<sup>D</sup>* Ki rats (Figure 3 and 4)  
471 only showed subtle but significant changes in  
472 A $\beta$ 42 and A $\beta$ 43 steady-state levels, which  
473 were slightly increased and decreased,  
474 respectively (Figure 3).

## Danish dementia and excitatory transmission

475 We have previously shown that the  
476 Danish and British *ITM2b* mutations lead to  
477 reduced glutamatergic neurotransmitter  
478 release and AMPAR-mediated responses in  
479 adult *Itm2b<sup>B</sup>* and *Itm2b<sup>D</sup>* mice (41). These  
480 reductions are like those seen in adult *Itm2b*  
481 knock-out mice (41,47). Interestingly, we  
482 detected identical, gene dosage-dependent,  
483 pre- and post-synaptic glutamatergic  
484 transmission changes in the SC pathway of  
485 peri-adolescent *Itm2b<sup>D</sup>* rats (Figure 5). More  
486 specifically, the frequency of mEPSC and the  
487 PPF are significantly decreased and  
488 increased, respectively, in *Itm2b<sup>D</sup>* rats,  
489 suggesting a pre-synaptic reduction of the Pr  
490 of glutamatergic synaptic vesicles. In  
491 addition, mEPSCs amplitude and the  
492 AMPA/NMDA ratio were both decreased in  
493 *Itm2b<sup>D</sup>* rats, suggesting a post-synaptic  
494 reduction of AMPAR-mediated responses.  
495 Collectively, these data together with our  
496 previously published observations, indicate  
497 that the synaptic transmission alteration  
498 caused by Danish mutation occur early in  
499 life, and are neither species nor gene-editing  
500 technology-specific. These studies underlie  
501 the potential relevance of our studies to  
502 functional changes caused by the pathogenic  
503 *ITM2b* mutations in humans.

504 Given the functional and pathological  
505 interaction between APP and BRI2 (26-36), it  
506 is possible that the presence of human A $\beta$  in  
507 the rat model may lead to an earlier  
508 manifestation of synaptic plasticity deficit in  
509 rat as compared to mice, which express  
510 rodent A $\beta$ . Moreover, the evidence that both  
511 APP and BRI2 tune excitatory synaptic  
512 transmission, and that these functions are  
513 altered by pathogenic mutations in both APP  
514 and BRI2 (37,41,47,55-57) suggest that early  
515 alterations in glutamatergic transmission may  
516 underlie initial pathogenic mechanisms in  
517 dementia. Future studies will be needed to  
518 test these hypotheses.

### 520 **EXPERIMENTAL PROCEDURES**

521 *Rats and ethics statement*- Rats were  
522 handled according to the NIH Ethical  
523 Guidelines for Treatment of Laboratory  
524 Animals. The procedures were described and  
525 approved by the Institutional Animal Care and

526 Use Committee (IACUC) at Rutgers (IACUC,  
527 protocol number PROTO201702513).

528 *Generation of rats expressing the Danish*  
529 *Itm2b* mutation (*Itm2<sup>D</sup>* rats). The rat *Itm2b*  
530 gene (GenBank accession number:  
531 NM\_001006963.1; Ensembl:  
532 ENSRNOG00000016271) is located on rat  
533 chromosome 15. It comprises 6 exons, with  
534 ATP start codon in exon 1 and TGA stop  
535 codon in exon 6. The FDD mutation  
536 (TTTAATTTGTTCTTGAACAGTCAAGAA  
537 AAACATTAT) KI site in oligo donor was  
538 introduced into exon 6, which is the target site  
539 by homology-directed repair. A silent  
540 mutation (GTG to GTC) was also introduced  
541 to prevent the binding and re-cutting of the  
542 sequence by Cas9 after homology-directed  
543 repair. The detailed procedures are reported in  
544 the Supporting Information file.

545 *Standard RNA-Seq analysis*- Total brain  
546 RNA from 21 days old *Itm2b<sup>D/D</sup>* and *Itm2b<sup>ww/</sup>*  
547 rats (2 male and 2 females per each genotype)  
548 was extracted with RNeasy RNA Isolation kit  
549 (Qiagen). Standard RNA-Seq procedures and  
550 data analysis was performed by Genewiz  
551 following proprietary methods  
552 ([https://cdn2.hubspot.net/hubfs/3478602/NGS/RNA-Seq/GENEWIZ\\_RNA-Seq\\_Technical\\_Specifications\\_US.pdf](https://cdn2.hubspot.net/hubfs/3478602/NGS/RNA-Seq/GENEWIZ_RNA-Seq_Technical_Specifications_US.pdf)).  
553 Student's t-test was used for all analyses, with  
554 data presented as mean  $\pm$  SD.

555 *Rats brain proteins preparation, Western*

556 *blots and ELISA*- These procedures were  
557 performed as previously described (42,54).  
558 Briefly, rats were anesthetized with  
559 isoflurane and perfused via intracardiac  
560 catheterization with ice-cold PBS. Brains  
561 were extracted and homogenized with a  
562 glass-teflon homogenizer in 250 mM  
563 Sucrose, 20 mM Tris-base pH 7.4, 1 mM  
564 EDTA, 1mM EGTA plus protease and  
565 phosphatase inhibitors (ThermoScientific).  
566 All steps were carried out on ice.  
567 Homogenates were solubilized with 1% NP-  
568 40 for 30 min rotating and spun at 20,000 g  
569 for 10 minutes. Supernatants were collected  
570 and protein content was quantified by  
571 Bradford.

572 For Western blot analyses, proteins were  
573 diluted with PBS and LDS Sample buffer-  
574 10%  $\beta$ -mercaptoethanol (Invitrogen

## Danish dementia and excitatory transmission

577 NP0007) and 4.5M urea to  $1\mu\text{g}/\mu\text{l}$ , loaded on  
578 a 4-12% Bis-Tris polyacrylamide gel  
579 (Biorad 3450125), and transferred onto  
580 nitrocellulose at 25V for 7min using the  
581 Trans-blot Turbo system (Biorad). Blotting  
582 efficiency was visualized by red Ponceau  
583 staining on membranes. For Dot-blot  
584 analysis 2.5  $\mu\text{g}$  of material was directly  
585 spotted with a p20 pipette on a nitrocellulose  
586 membrane. Dot membrane was also  
587 visualized by red Ponceau after it was totally  
588 dried. Membranes were blocked in 5%-milk  
589 (Biorad 1706404) for 30 minutes and  
590 washed in PBS/Tween20-0.05%. Primary  
591 antibodies were applied dilution in blocking  
592 solution (Thermo 37573). The following  
593 antibodies were used: Polyclonal anti-Bri2  
594 serum test bleeds provided by Cell Signaling  
595 Technology was used at 1:500 with  
596 overnight shaking at 4°C. APP-Y188  
597 (Abcam32136), Oligomer A $\beta$  A11 (shared  
598 by Rakez Kayed's Lab), LC3A (CST 4599)  
599 and LC3B (CST 2775) were used at 1:1000  
600 with same other condition. Secondary  
601 antibodies [either anti-mouse (Southern  
602 Biotech 1031-05) or a 1:1 mix of anti-rabbit  
603 (Southern Biotech, OB405005) and anti-  
604 rabbit (Cell Signaling, 7074)], were diluted  
605 1:1000 in 5% milk and used against either  
606 mouse or rabbit primary antibodies for 1  
607 hour at RT, with shaking. Membranes were  
608 washed with PBS/Tween20-0.05% (3 times,  
609 10 minutes each time), developed with West  
610 Dura ECL reagent (Thermo, PI34076) and  
611 visualized on a ChemiDoc MP Imaging  
612 System (Biorad). Signal intensity was  
613 quantified with Image Lab software  
614 (Biorad). Data were analyzed using Prism  
615 software and represented as mean  $\pm$  SD.  
616 For analysis of human A $\beta$  peptides and  
617 sAPP $\alpha$ /sAPP $\beta$ , brain lysates were diluted at  
618  $4\mu\text{g}/\mu\text{l}$ . A $\beta$ 38, A $\beta$ 40, and A $\beta$ 42 were  
619 measured with V-PLEX Plus A $\beta$  Peptide  
620 Panel 1 6E10 (K15200G, Meso Scale  
621 Discovery) and sAPP $\alpha$ /sAPP $\beta$  were  
622 measured with sAPP $\alpha$ /sAPP $\beta$  (K15120E,  
623 Meso Scale Discovery). Plates were read on  
624 a MESO QuickPlex SQ 120. A $\beta$ 43 was  
625 quantified using the IBL human A $\beta$ 43 Assay  
626 Kit #27710.

627 *Primary hippocampal neuron culture-* Rat  
628 hippocampal neurons were prepared from  
629 *Itm2b<sup>w/w</sup>* and *Itm2b<sup>D/D</sup>* post-natal day 1 pups.  
630 Briefly, after removal of meninges, the  
631 hippocampi were collected in HBSS without  
632 magnesium and calcium, 1mM sodium  
633 pyruvate, 0.1% glucose, 10mM HEPES.  
634 Hippocampi were dissected into single cell by  
635 trituration followed by 15 minutes incubation  
636 at 37°C in 0.25% trypsin. Cells were  
637 subsequently treated with 0.1% DNase  
638 (Sigma, dn25) in plating media (BME, 10%  
639 FBS, 0.09% Glucose, 1mM Sodium Pyruvate,  
640 2mM Glutamine, 1x Pen/Strep). Cells were  
641 filtered through a Falcon 70 $\mu\text{m}$  nylon cell  
642 strainer and were plated in Poly L lysine  
643 pretreated 12-well-plate (300,000 cells/well)  
644 in Neurobasal media, 1x B-27, 2mM  
645 glutamine, 1x Pen/Strep. Half of the culture  
646 media was changed every 2 days.  
647 *Pharmacological treatment and sample*  
648 *preparation-* After 9 days in culture, primary  
649 neurons were treated with 50 $\mu\text{M}$  Chloroquine  
650 (Cell signaling, 14774s) or PBS (Veh) for 18  
651 hours. After treatment, cells were washed with  
652 PBS and lysed in RIPA buffer with  
653 protease/phosphatase inhibitor for 15 minutes  
654 on ice. Lysed cells were centrifuged at full  
655 speed for 15 minutes. Cell lysates were  
656 quantified and analyzed by Western blot as  
657 described earlier for brain lysates.  
658 *Electrophysiological recording-* These  
659 procedures were performed as previously  
660 described (44). Briefly, rats were anesthetized  
661 with isoflurane and perfused intracardially  
662 with an ice-cold cutting solution containing (in  
663 mM) 120 choline chloride, 2.6 KCl, 26 NaH  
664 CO<sub>3</sub>, 1.25 NaH<sub>2</sub>PO<sub>4</sub>, 0.5 CaCl<sub>2</sub>, 7 MgCl<sub>2</sub>, 1.3  
665 ascorbic acid, 15 glucose, prebubbled with  
666 95% O<sub>2</sub>/5% CO<sub>2</sub> for 15 min. The brains were  
667 rapidly removed from the skull and coronal  
668 brain slices containing the hippocampal  
669 formation (350 $\mu\text{m}$  thick) were prepared in the  
670 ice-cold cutting solution bubbled with 95%  
671 O<sub>2</sub>/5% CO<sub>2</sub> using Vibratome VT1200S (Leica  
672 Microsystems) and then incubated in an  
673 interface chamber in ACSF containing (in  
674 mM): 126 NaCl, 3 KCl, 1.2 NaH<sub>2</sub>PO<sub>4</sub>; 1.3  
675 MgCl<sub>2</sub>, 2.4 CaCl<sub>2</sub>, 26 NaHCO<sub>3</sub>, and 10 glucose  
676 (at pH 7.3), bubbled with 95% O<sub>2</sub> and 5% CO<sub>2</sub>



## Danish dementia and excitatory transmission

677 at 30°C for 1hr and then kept at room  
678 temperature. The hemi-slices were transferred  
679 to a recording chamber perfused with ACSF at  
680 a flow rate of ~2ml/min using a peristaltic  
681 pump. Experiments were performed at 28.0 ±  
682 0.1°C.

683 Whole-cell recordings in the voltage-  
684 clamp mode(-70 mv) were made with patch  
685 pipettes containing (in mM): 132.5 Cs-  
686 gluconate, 17.5 CsCl, 2 MgCl<sub>2</sub>, 0.5 EGTA, 10  
687 HEPES, 4 ATP, and 5 QX-314, with pH  
688 adjusted to 7.3 by CsOH. Patch pipettes  
689 (resistance, 8–10 MΩ) were pulled from 1.5  
690 mm thin-walled borosilicate glass (Sutter  
691 Instruments, Novato, CA) on a horizontal  
692 puller (model P-97; Sutter Instruments,  
693 Novato, CA). Basal synaptic responses were  
694 evoked at 0.05 Hz by electrical stimulation of  
695 the Schaffer collateral afferents using  
696 concentric bipolar electrodes. CA1 neurons  
697 were viewed under upright microscopy (FN-1,  
698 Nikon Instruments, Melville, NY) and  
699 recorded with Axopatch-700B amplifier  
700 (Molecular Devices, San Jose, CA). Data were  
701 low-pass filtered at 2 kHz and acquired at 5–  
702 10 kHz. The series resistance (Rs) was  
703 consistently monitored during recording in  
704 case of reseal of ruptured membrane. Cells  
705 with Rs >20 MΩ or with Rs deviated by >20%  
706 from initial values were excluded from  
707 analysis. Excitatory postsynaptic currents  
708 (EPSCs) were recorded in ACSF containing  
709 the GABA-A receptors inhibitor bicuculline  
710 methiodide (15μM). The stimulation intensity  
711 was adjusted to evoke EPSCs that were 40%  
712 of the maximal evoked amplitudes (“test  
713 intensity”). 5–10 min after membrane rupture,  
714 EPSCs were recorded for 7 minutes at a test  
715 stimulation intensity that produced currents of  
716 ~40% maximum. For recording of paired-  
717 pulse ratio (PPR), paired-pulse stimuli with  
718 50ms or 200ms inter-pulse interval were  
719 given. The PPR was calculated as the ratio of  
720 the second EPSC amplitude to the first. For  
721 recording of AMPA/NMDA ratio, the  
722 membrane potential was firstly held at -70 mV  
723 to record only AMPAR current for 20 sweeps  
724 with 20s intervals. Then the membrane  
725 potential was turned to +40 mV to record  
726 NMDAR current for 20 sweeps with perfusion

727 of 5μM NBQX to block AMPAR. Mini  
728 EPSCs were recorded by maintaining neurons  
729 at -70 mV with ACSF containing action  
730 potentials blocker (1μM TTX) and GABA-A  
731 receptors inhibitors (15μM bicuculline  
732 methiodide). mEPSCs were recorded for ~10  
733 mins. Data were collected with Axopatch  
734 700B amplifiers and analyzed with  
735 pCLAMP10 software (Molecular Devices).  
736 mEPSCs are analyzed using mini-Analysis  
737 Program.

738 *Statistics*- All the experiments mentioned  
739 in the paper were analyzed by one-way  
740 ANOVA or two-way ANOVA as indicated.  
741 Data showing statistical significance by one-  
742 way ANOVA or two-way ANOVA were  
743 subsequently analyzed by either Tukey's  
744 multiple comparisons test or Sidak's multiple  
745 comparisons. All statistical analyses were  
746 performed using Prism 9 (GraphPad) software.

747  
748 *Acknowledgement*- All authors read and  
749 approved the final manuscript.

750 *Declarations*-The datasets used and/or  
751 analyzed during the current study are available  
752 from the corresponding author on reasonable  
753 request.

754 *Conflicts of interest*-The authors declare  
755 that they have no competing interests.

756 *Author Contributions*- LD generated the  
757 animals; KAN set up breeding and genotyped  
758 animals; TY performed the biochemical and  
759 molecular experiments; WY performed the  
760 electrophysiology experiments; All authors  
761 designed the experiments; LD and TY wrote  
762 the paper.

763 *L.D. was funded by the NIH/NIA*  
764 *R01AG063407, R01AG064821,*  
765 *1R01AG033007*

## 766 **References**

- 768 1. Tamayev, R., Matsuda, S., Fa, M.,  
769 Arancio, O., and D'Adamo, L.  
770 (2010) Danish dementia mice  
771 suggest that loss of function and  
772 not the amyloid cascade causes  
773 synaptic plasticity and memory  
774 deficits. *Proc Natl Acad Sci U S A*  
775 **107**, 20822-20827



## Danish dementia and excitatory transmission

- 776 2. Tamayev, R., Giliberto, L., Li, W.,  
777 d'Abramo, C., Arancio, O., Vidal,  
778 R., and D'Adamio, L. (2010)  
779 Memory deficits due to familial  
780 British dementia BRI2 mutation  
781 are caused by loss of BRI2 function  
782 rather than amyloidosis. *J Neurosci*  
783 **30**, 14915-14924
- 784 3. Giliberto, L., Matsuda, S., Vidal, R.,  
785 and D'Adamio, L. (2009)  
786 Generation and initial  
787 characterization of FDD knock in  
788 mice. *PLoS One* **4**, e7900
- 789 4. Deacon, R. M. (2006) Housing,  
790 husbandry and handling of rodents  
791 for behavioral experiments. *Nat*  
792 *Protoc* **1**, 936-946
- 793 5. Whishaw, I. Q., Metz, G. A., Kolb,  
794 B., and Pellis, S. M. (2001)  
795 Accelerated nervous system  
796 development contributes to  
797 behavioral efficiency in the  
798 laboratory mouse: a behavioral  
799 review and theoretical proposal.  
800 *Dev Psychobiol* **39**, 151-170
- 801 6. Kepecs, A., Uchida, N., Zariwala, H.  
802 A., and Mainen, Z. F. (2008) Neural  
803 correlates, computation and  
804 behavioural impact of decision  
805 confidence. *Nature* **455**, 227-231
- 806 7. Foote, A. L., and Crystal, J. D.  
807 (2007) Metacognition in the rat.  
808 *Curr Biol* **17**, 551-555
- 809 8. Bartelle, B. B., Barandov, A., and  
810 Jasanoff, A. (2016) Molecular  
811 fMRI. *J Neurosci* **36**, 4139-4148
- 812 9. Zimmer, E. R., Leuzy, A., Bhat, V.,  
813 Gauthier, S., and Rosa-Neto, P.  
814 (2014) In vivo tracking of tau  
815 pathology using positron emission  
816 tomography (PET) molecular  
817 imaging in small animals. *Transl*  
818 *Neurodegener* **3**, 6
- 819 10. Leuzy, A., Zimmer, E. R., Heurling,  
820 K., Rosa-Neto, P., and Gauthier, S.  
821 (2014) Use of amyloid PET across  
822 the spectrum of Alzheimer's  
823 disease: clinical utility and  
824 associated ethical issues. *Amyloid*  
825 **21**, 143-148
- 826 11. Zimmer, E. R., Leuzy, A., Gauthier,  
827 S., and Rosa-Neto, P. (2014)  
828 Developments in Tau PET Imaging.  
829 *Can J Neurol Sci* **41**, 547-553
- 830 12. Andreadis, A. (2005) Tau gene  
831 alternative splicing: expression  
832 patterns, regulation and  
833 modulation of function in normal  
834 brain and neurodegenerative  
835 diseases. *Biochim Biophys Acta*  
836 **1739**, 91-103
- 837 13. Janke, C., Beck, M., Stahl, T.,  
838 Holzer, M., Brauer, K., Bigl, V., and  
839 Arendt, T. (1999) Phylogenetic  
840 diversity of the expression of the  
841 microtubule-associated protein  
842 tau: implications for  
843 neurodegenerative disorders.  
844 *Brain Res Mol Brain Res* **68**, 119-  
845 128
- 846 14. Hong, M., Zhukareva, V.,  
847 Vogelsberg-Ragaglia, V., Wszolek,  
848 Z., Reed, L., Miller, B. I.,  
849 Geschwind, D. H., Bird, T. D.,  
850 McKeel, D., Goate, A., Morris, J. C.,  
851 Wilhelmsen, K. C., Schellenberg, G.  
852 D., Trojanowski, J. Q., and Lee, V.  
853 M. (1998) Mutation-specific  
854 functional impairments in distinct  
855 tau isoforms of hereditary FTDP-  
856 17. *Science* **282**, 1914-1917
- 857 15. Roberson, E. D., Scarce-Levie, K.,  
858 Palop, J. J., Yan, F., Cheng, I. H.,  
859 Wu, T., Gerstein, H., Yu, G. Q., and  
860 Mucke, L. (2007) Reducing  
861 endogenous tau ameliorates  
862 amyloid beta-induced deficits in an

## Danish dementia and excitatory transmission

- 863 Alzheimer's disease mouse model. 907  
864 *Science* **316**, 750-754 908  
865 16. Spillantini, M. G., and Goedert, M. 909  
866 (1998) Tau protein pathology in 910  
867 neurodegenerative diseases. 911  
868 *Trends Neurosci* **21**, 428-433 912  
869 17. Goedert, M., Crowther, R. A., and 913  
870 Spillantini, M. G. (1998) Tau 21.  
871 mutations cause frontotemporal 914 Yasuda, M., Takamatsu, J.,  
872 dementias. *Neuron* **21**, 955-958 915 D'Souza, I., Crowther, R. A.,  
873 18. Grundke-Iqbal, I., Iqbal, K., Tung, Y. 916 Kawamata, T., Hasegawa, M.,  
874 C., Quinlan, M., Wisniewski, H. M., 917 Hasegawa, H., Spillantini, M. G.,  
875 and Binder, L. I. (1986) Abnormal 918 Tanimukai, S., Poorkaj, P., Varani,  
876 phosphorylation of the 919 L., Varani, G., Iwatsubo, T.,  
877 microtubule-associated protein 920 Goedert, M., Schellenberg, D. G.,  
878 tau (tau) in Alzheimer cytoskeletal 921 and Tanaka, C. (2000) A novel  
879 pathology. *Proc Natl Acad Sci U S A* 922 mutation at position +12 in the  
880 **83**, 4913-4917 923 intron following exon 10 of the tau  
881 19. Hutton, M., Lendon, C. L., Rizzu, P., 924 gene in familial frontotemporal  
882 Baker, M., Froelich, S., Houlden, 925 dementia (FTD-Kumamoto). *Ann*  
883 H., Pickering-Brown, S., 926 *Neurol* **47**, 422-429  
884 Chakraverty, S., Isaacs, A., Grover, 927 22.  
885 A., Hackett, J., Adamson, J., 928 Kowalska, A., Hasegawa, M.,  
886 Lincoln, S., Dickson, D., Davies, P., 929 Miyamoto, K., Akiguchi, I.,  
887 Petersen, R. C., Stevens, M., de 930 Ikemoto, A., Takahashi, K., Araki,  
888 Graaff, E., Wauters, E., van Baren, 931 W., and Tabira, T. (2002) A novel  
889 J., Hillebrand, M., Joosse, M., 932 mutation at position +11 in the  
890 Kwon, J. M., Nowotny, P., Che, L. 933 intron following exon 10 of the tau  
891 K., Norton, J., Morris, J. C., Reed, L. 934 gene in FTDP-17. *J Appl Genet* **43**,  
892 A., Trojanowski, J., Basun, H., 935 535-543  
893 Lannfelt, L., Neystat, M., Fahn, S., 23.  
894 Dark, F., Tannenberg, T., Dodd, P. 936 Grover, A., England, E., Baker, M.,  
895 R., Hayward, N., Kwok, J. B., 937 Sahara, N., Adamson, J., Granger,  
896 Schofield, P. R., Andreadis, A., 938 B., Houlden, H., Passant, U., Yen, S.  
897 Snowden, J., Craufurd, D., Neary, 939 H., DeTure, M., and Hutton, M.  
898 D., Owen, F., Oostra, B. A., Hardy, 940 (2003) A novel tau mutation in  
899 J., Goate, A., van Swieten, J., 941 exon 9 (1260V) causes a four-  
900 Mann, D., Lynch, T., and Heutink, 942 repeat tauopathy. *Exp Neurol* **184**,  
901 P. (1998) Association of missense 943 131-140  
902 and 5'-splice-site mutations in tau 24.  
903 with the inherited dementia FTDP- 944 Hanes, J., Zilka, N., Bartkova, M.,  
904 17. *Nature* **393**, 702-705 945 Caletkova, M., Dobrota, D., and  
905 20. Stanford, P. M., Shepherd, C. E., 946 Novak, M. (2009) Rat tau  
906 Halliday, G. M., Brooks, W. S., 947 proteome consists of six tau  
948 isoforms: implication for animal  
949 models of human tauopathies. *J*  
*Neurochem* **108**, 1167-1176

## Danish dementia and excitatory transmission

- 950 25. McMillan, P., Korvatska, E.,  
951 Poorkaj, P., Evstafjeva, Z.,  
952 Robinson, L., Greenup, L.,  
953 Leverenz, J., Schellenberg, G. D.,  
954 and D'Souza, I. (2008) Tau isoform  
955 regulation is region- and cell-  
956 specific in mouse brain. *J Comp*  
957 *Neurol* **511**, 788-803
- 958 26. Matsuda, S., Giliberto, L.,  
959 Matsuda, Y., Davies, P., McGowan,  
960 E., Pickford, F., Ghiso, J.,  
961 Frangione, B., and D'Adamio, L.  
962 (2005) The familial dementia BRI2  
963 gene binds the Alzheimer gene  
964 amyloid-beta precursor protein  
965 and inhibits amyloid-beta  
966 production. *J Biol Chem* **280**,  
967 28912-28916
- 968 27. Fotinopoulou, A., Tsachaki, M.,  
969 Vlavaki, M., Pouloupoulos, A.,  
970 Rostagno, A., Frangione, B., Ghiso,  
971 J., and Efthimiopoulos, S. (2005)  
972 BRI2 interacts with amyloid  
973 precursor protein (APP) and  
974 regulates amyloid beta (Abeta)  
975 production. *J Biol Chem* **280**,  
976 30768-30772
- 977 28. Matsuda, S., Giliberto, L.,  
978 Matsuda, Y., McGowan, E. M., and  
979 D'Adamio, L. (2008) BRI2 inhibits  
980 amyloid beta-peptide precursor  
981 protein processing by interfering  
982 with the docking of secretases to  
983 the substrate. *J Neurosci* **28**, 8668-  
984 8676
- 985 29. Matsuda, S., Matsuda, Y., Snapp,  
986 E. L., and D'Adamio, L. (2011)  
987 Maturation of BRI2 generates a  
988 specific inhibitor that reduces APP  
989 processing at the plasma  
990 membrane and in endocytic  
991 vesicles. *Neurobiol Aging* **32**, 1400-  
992 1408
- 993 30. Matsuda, S., Tamayev, R., and  
994 D'Adamio, L. (2011) Increased  
995 A $\beta$ PP processing in familial Danish  
996 dementia patients. *J Alzheimers*  
997 *Dis* **27**, 385-391
- 998 31. Tamayev, R., Matsuda, S.,  
999 Giliberto, L., Arancio, O., and  
1000 D'Adamio, L. (2011) APP  
1001 heterozygosity averts memory  
1002 deficit in knockin mice expressing  
1003 the Danish dementia BRI2 mutant.  
1004 *EMBO J* **30**, 2501-2509
- 1005 32. Tamayev, R., and D'Adamio, L.  
1006 (2012) Inhibition of  $\gamma$ -secretase  
1007 worsens memory deficits in a  
1008 genetically congruous mouse  
1009 model of Danish dementia. *Mol*  
1010 *Neurodegener* **7**, 19
- 1011 33. Tamayev, R., and D'Adamio, L.  
1012 (2012) Memory deficits of British  
1013 dementia knock-in mice are  
1014 prevented by A $\beta$ -precursor protein  
1015 haploinsufficiency. *J Neurosci* **32**,  
1016 5481-5485
- 1017 34. Tamayev, R., Matsuda, S., Arancio,  
1018 O., and D'Adamio, L. (2012)  $\beta$ - but  
1019 not  $\gamma$ -secretase proteolysis of APP  
1020 causes synaptic and memory  
1021 deficits in a mouse model of  
1022 dementia. *EMBO Mol Med* **4**, 171-  
1023 179
- 1024 35. Lombino, F., Biundo, F., Tamayev,  
1025 R., Arancio, O., and D'Adamio, L.  
1026 (2013) An intracellular threonine  
1027 of amyloid- $\beta$  precursor protein  
1028 mediates synaptic plasticity  
1029 deficits and memory loss. *PLoS*  
1030 *One* **8**, e57120
- 1031 36. Biundo, F., Ishiwari, K., Del Prete,  
1032 D., and D'Adamio, L. (2016)  
1033 Deletion of the  $\gamma$ -secretase  
1034 subunits Aph1B/C impairs memory  
1035 and worsens the deficits of knock-  
1036 in mice modeling the Alzheimer-

## Danish dementia and excitatory transmission

- 1037 like familial Danish dementia. 1080 43. Ren, S., Breuillaud, L., Yao, W., Yin,  
1038 *Oncotarget* **7**, 11923-11944 1081 T., Norris, K. A., Zehntner, S. P.,  
1039 37. Tambini, M. D., Yao, W., and 1082 and D'Adamio, L. (2020) TNF- $\alpha$ -  
1040 D'Adamio, L. (2019) Facilitation of 1083 mediated reduction in inhibitory  
1041 glutamate, but not GABA, release 1084 neurotransmission precedes  
1042 in Familial Alzheimer's APP mutant 1085 sporadic Alzheimer's disease  
1043 Knock-in rats with increased  $\beta$ - 1086 pathology in young. *J Biol Chem*  
1044 cleavage of APP. *Aging Cell* **18**, 1087 44. Ren, S., Yao, W., Tambini, M. D.,  
1045 e13033 1088 Yin, T., Norris, K. A., and D'Adamio,  
1046 38. Tambini, M. D., Norris, K. A., and 1089 L. (2020) Microglia *TREM2*<sup>R47H</sup>  
1047 D'Adamio, L. (2020) Opposite 1090 Alzheimer-linked variant enhances  
1048 changes in APP processing and 1091 excitatory transmission and  
1049 human A $\beta$  levels in rats carrying 1092 reduces LTP via increased TNF- $\alpha$   
1050 either a protective or a pathogenic 1093 levels. *Elife* **9**  
1051 APP mutation. *Elife* **9** 1094 45. Shankar, G. M., Li, S., Mehta, T. H.,  
1052 39. Vidal, R., Revesz, T., Rostagno, A., 1095 Garcia-Munoz, A., Shepardson, N.  
1053 Kim, E., Holton, J. L., Bek, T., 1096 E., Smith, I., Brett, F. M., Farrell,  
1054 Bojsen-Møller, M., Braendgaard, 1097 M. A., Rowan, M. J., Lemere, C. A.,  
1055 H., Plant, G., Ghiso, J., and 1098 Regan, C. M., Walsh, D. M.,  
1056 Frangione, B. (2000) A decamer 1099 Sabatini, B. L., and Selkoe, D. J.  
1057 duplication in the 3' region of the 1100 (2008) Amyloid-beta protein  
1058 BRI gene originates an amyloid 1101 dimers isolated directly from  
1059 peptide that is associated with 1102 Alzheimer's brains impair synaptic  
1060 dementia in a Danish kindred. *Proc 1103 plasticity and memory. Nat Med*  
1061 *Natl Acad Sci U S A* **97**, 4920-4925 1104 **14**, 837-842  
1062 40. Choi, S. I., Vidal, R., Frangione, B., 1105 46. Kaye, R., Head, E., Thompson, J.  
1063 and Levy, E. (2004) Axonal 1106 L., McIntire, T. M., Milton, S. C.,  
1064 transport of British and Danish 1107 Cotman, C. W., and Glabe, C. G.  
1065 amyloid peptides via secretory 1108 (2003) Common structure of  
1066 vesicles. *FASEB J* **18**, 373-375 1109 soluble amyloid oligomers implies  
1067 41. Yin, T., Yao, W., Lemenze, A. D., 1110 common mechanism of  
1068 and D'Adamio, L. (2020) Danish 1111 pathogenesis. *Science* **300**, 486-  
1069 and British dementia ITM2b/BRI2 1112 489  
1070 mutations reduce BRI2 protein 1113 47. Yao, W., Yin, T., Tambini, M. D.,  
1071 stability and impair glutamatergic 1114 and D'Adamio, L. (2019) The  
1072 synaptic transmission. *J Biol Chem* 1115 Familial dementia gene  
1073 42. Tambini, M. D., and D'Adamio, L. 1116 ITM2b/BRI2 facilitates glutamate  
1074 (2020) Trem2 Splicing and 1117 transmission via both presynaptic  
1075 Expression are Preserved in a 1118 and postsynaptic mechanisms. *Sci*  
1076 Human Abeta-producing, Rat 1119 *Rep* **9**, 4862  
1077 Knock-in Model of Trem2-R47H 1120 48. Zucker, R. S., and Regehr, W. G.  
1078 Alzheimer's Risk Variant. *Sci Rep* 1121 (2002) Short-term synaptic  
1079 **10**, 4122 1122 plasticity. *Annu Rev Physiol* **64**,  
1123 355-405



## Danish dementia and excitatory transmission

- 1124 49. Barbagallo, A. P., Wang, Z., Zheng,  
1125 H., and D'Adamio, L. (2011) The  
1126 intracellular threonine of amyloid  
1127 precursor protein that is essential  
1128 for docking of Pin1 is dispensable  
1129 for developmental function. *PLoS*  
1130 *One* **6**, e18006
- 1131 50. Barbagallo, A. P., Wang, Z., Zheng,  
1132 H., and D'Adamio, L. (2011) A  
1133 single tyrosine residue in the  
1134 amyloid precursor protein  
1135 intracellular domain is essential for  
1136 developmental function. *J Biol*  
1137 *Chem* **286**, 8717-8721
- 1138 51. Barbagallo, A. P., Weldon, R.,  
1139 Tamayev, R., Zhou, D., Giliberto, L.,  
1140 Foreman, O., and D'Adamio, L.  
1141 (2010) Tyr(682) in the intracellular  
1142 domain of APP regulates  
1143 amyloidogenic APP processing in  
1144 vivo. *PLoS One* **5**, e15503
- 1145 52. Garringer, H. J., Murrell, J.,  
1146 D'Adamio, L., Ghetti, B., and Vidal,  
1147 R. (2010) Modeling familial British  
1148 and Danish dementia. *Brain Struct*  
1149 *Funct* **214**, 235-244
- 1150 53. Ren, S., Breuillaud, L., Yao, W., Yin,  
1151 T., Norris, K. A., Zehntner, S. P.,  
1152 and D'Adamio, L. (2020) TNF- $\alpha$ -  
1153 mediated reduction in inhibitory  
1154 neurotransmission precedes  
1155 sporadic Alzheimer's disease  
1156 pathology in young Trem2<sup>R47H</sup>  
1157 rats. *J Biol Chem* **296**, 100089
- 1158 54. Tambini, M. D., and D'Adamio, L.  
1159 (2020) Knock-in rats with  
1160 homozygous *PSEN1* L<sup>435F</sup> Alzheimer  
1161 mutation are viable and show  
1162 selective  $\gamma$ -secretase activity loss  
1163 causing low A $\beta$ 40/42 and high  
1164 A $\beta$ 43. *J Biol Chem* **295**, 7442-7451
- 1165 55. Yao, W., Tambini, M. D., Liu, X.,  
1166 and D'Adamio, L. (2019) Tuning of  
1167 Glutamate, But Not GABA, Release  
1168 by an Intrasyntaptic Vesicle APP  
1169 Domain Whose Function Can Be  
1170 Modulated by  $\beta$ - or  $\alpha$ -Secretase  
1171 Cleavage. *J Neurosci* **39**, 6992-  
1172 7005
- 1173 56. Fanutza, T., Del Prete, D., Ford, M.  
1174 J., Castillo, P. E., and D'Adamio, L.  
1175 (2015) APP and APLP2 interact  
1176 with the synaptic release  
1177 machinery and facilitate  
1178 transmitter release at  
1179 hippocampal synapses. *Elife* **4**,  
1180 e09743
- 1181 57. Del Prete, D., Lombino, F., Liu, X.,  
1182 and D'Adamio, L. (2014) APP is  
1183 cleaved by Bace1 in pre-synaptic  
1184 vesicles and establishes a pre-  
1185 synaptic interactome, via its  
1186 intracellular domain, with  
1187 molecular complexes that regulate  
1188 pre-synaptic vesicles functions.  
1189 *PLoS One* **9**, e108576  
1190

1191

1192

## Danish dementia and excitatory transmission

1193

### Figure legends

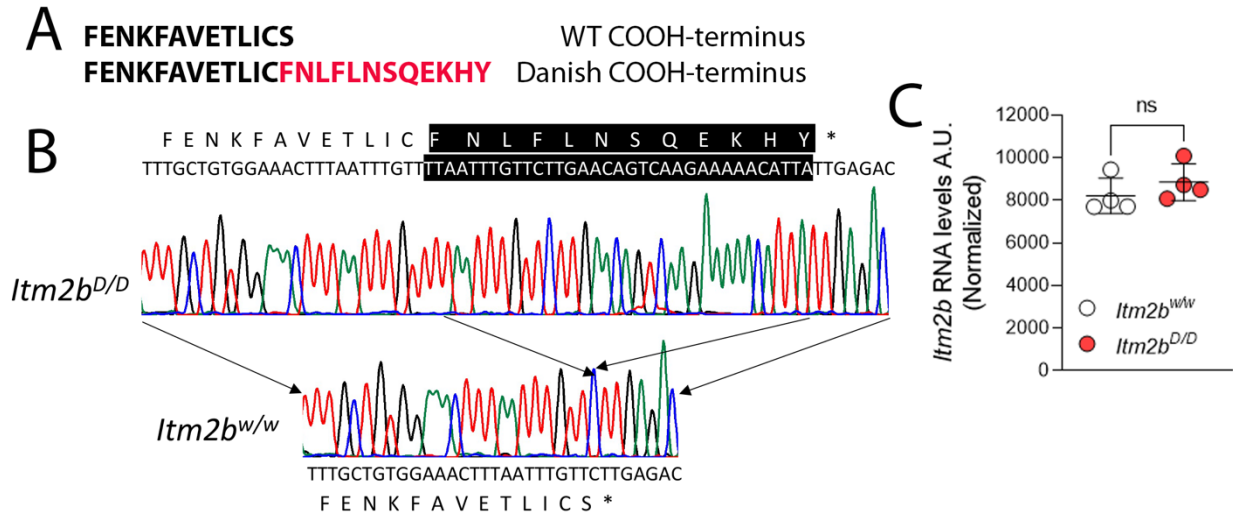

1194

1195

1196

1197

1198

1199

1200

1201

1202

1203

1204

1205

**Figure 1. Characterization of *Itm2b*<sup>D</sup> KI rats.** (A) Sequences of the COOH-terminus of Bri2-23 (WT) and Bri2-ADan (Danish). (B) PCR amplification and sequencing of the *Itm2b* gene exon 6 from *Itm2b*<sup>w/w</sup> and *Itm2b*<sup>D/D</sup> rats shows that the Danish mutation was correctly inserted in the *Itm2b* exon 6 of *Itm2b*<sup>D/D</sup> rats. This mutation causes the predicted frameshift in the BRI2 sequence generating a precursor protein 11 amino acids larger-than-normal coding for the Bri2-ADan mutant protein (partial DNA sequences of WT and Danish exon 6 are shown. Inserted nucleotides are highlighted in black, and the amino-acid sequences are indicated above -for the Danish mutant allele- and below -for the WT allele- the DNA sequences). (C) Levels of *Itm2b* mRNA in brains of 21 days old *Itm2b*<sup>w/w</sup> and *Itm2b*<sup>D/D</sup> rats were determined by Standard-RNAseq analysis. No significant differences between *Itm2b*<sup>w/w</sup> and *Itm2b*<sup>D/D</sup> rats were evident. Data are represented as mean ± SD. Data were analyzed by Student's t-test. N=4 rats per genotype.

Danish dementia and excitatory transmission

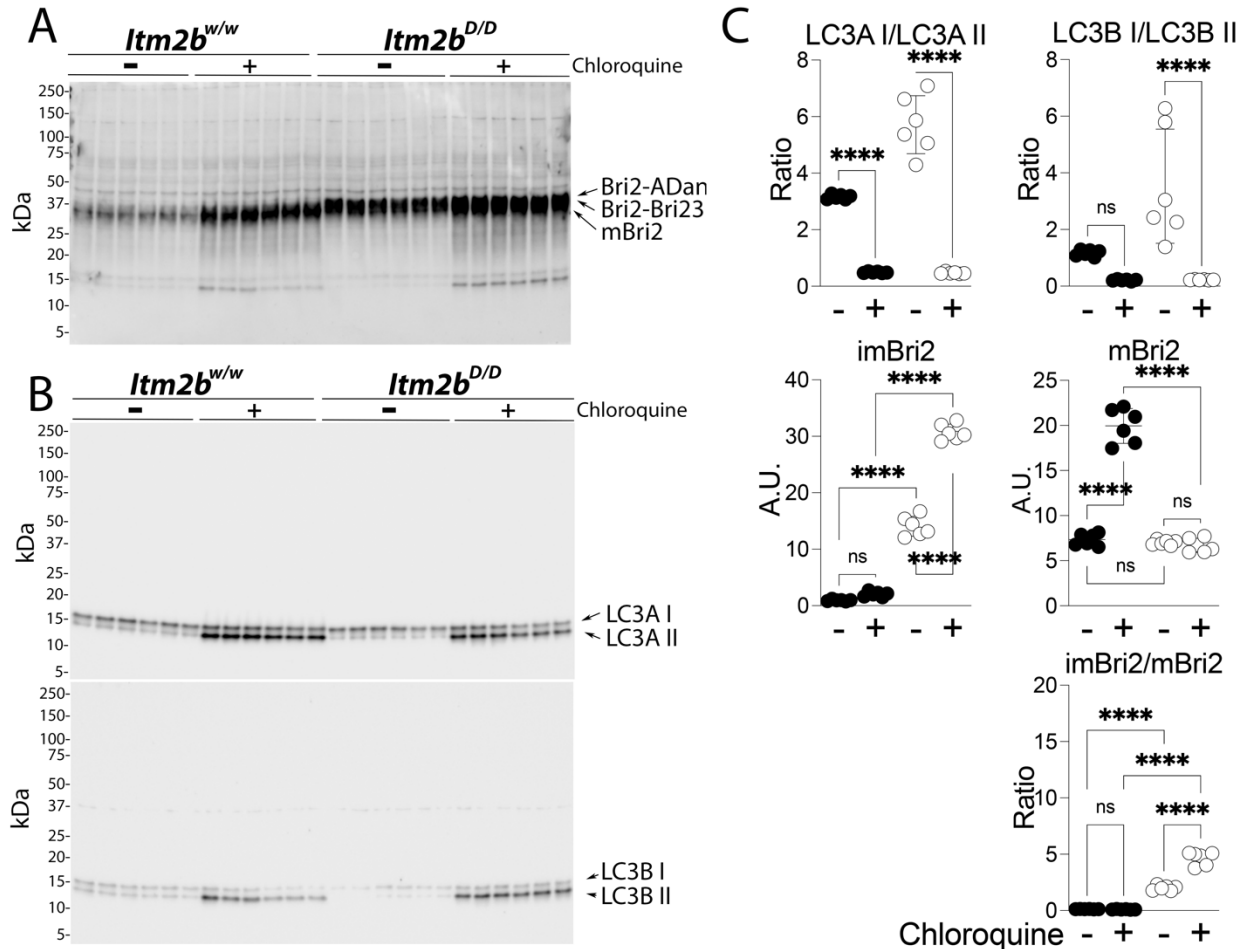

**Figure 2. Distinct degradation pathways of Bri2-23 and Bri2-ADan in *Itm2b<sup>w/w</sup>* and *Itm2b<sup>D/D</sup>* primary neurons.** WB analysis of Bri2 (A) and LC3A/B (B) from primary hippocampal neurons isolated from *Itm2b<sup>w/w</sup>* and *Itm2b<sup>D/D</sup>* P1 pups treated with 50 $\mu$ M chloroquine for 18h. (C) Quantification of LC3A/B and Bri2 levels. Data are represented as mean  $\pm$  SD and analyzed by ordinary two-way ANOVA followed by post-hoc Sidak's multiple comparisons test when ANOVA showed significant differences. ANOVA summary: LC3A:  $F_{\text{interaction (1,20)}}=37.36$ ,  $P<0.0001$ ,  $F_{\text{treatment (1,20)}}=353.5$ ,  $P<0.0001$ ,  $F_{\text{genotype (1,20)}}=36.16$ ,  $P<0.0001$ . Post-hoc Sidak's multiple comparisons test: *Itm2b<sup>w/w</sup>*: veh vs Chlor,  $P<0.0001$ \*\*\*\*, *Itm2b<sup>D/D</sup>*: veh vs Chlor,  $P<0.0001$ \*\*\*\*. LC3B:  $F_{\text{interaction (1,20)}}=8.11$ ,  $P<0.01$ ,  $F_{\text{treatment (1,20)}}=26.75$ ,  $P<0.0001$ ,  $F_{\text{genotype (1,20)}}=8.283$ ,  $P<0.01$ , post-hoc Sidak's multiple comparisons test: *Itm2b<sup>w/w</sup>*: veh vs Chlor,  $P=0.2185$ , *Itm2b<sup>D/D</sup>*: veh vs Chlor,  $P<0.0001$ \*\*\*\*. ImBri2:  $F_{\text{interaction (1,20)}}=272.2$ ,  $P<0.0001$ ,  $F_{\text{treatment (1,20)}}=354.3$ ,  $P<0.0001$ \*\*\*\*,  $F_{\text{genotype (1,20)}}=1966$ ,  $P<0.0001$ \*\*\*\*, post-hoc Sidak's multiple comparisons test: *Itm2b<sup>w/w</sup>*: veh vs Chlor,  $P=0.5229$ , *Itm2b<sup>D/D</sup>*: veh vs Chlor,  $P<0.0001$ \*\*\*\*. No treatment: *Itm2b<sup>w/w</sup>* vs *Itm2b<sup>D/D</sup>*,  $P<0.0001$ \*\*\*\*. Chlor treatment: *Itm2b<sup>w/w</sup>* vs *Itm2b<sup>D/D</sup>*,  $P<0.0001$ \*\*\*\*. mBri2:  $F_{\text{interaction (1,20)}}=207.4$ ,  $P<0.0001$ ,  $F_{\text{treatment (1,20)}}=186.9$ ,  $P<0.0001$ ,  $F_{\text{genotype (1,20)}}=228.5$ ,  $P<0.0001$ , post-hoc Sidak's multiple comparisons test: *Itm2b<sup>w/w</sup>*: veh vs Chlor,  $P<0.0001$ \*\*\*\*, *Itm2b<sup>D/D</sup>*: veh vs Chlor,  $P=0.9966$ . No treatment: *Itm2b<sup>w/w</sup>* vs *Itm2b<sup>D/D</sup>*,  $P=0.9969$  ns. Chlor treatment: *Itm2b<sup>w/w</sup>* vs *Itm2b<sup>D/D</sup>*,  $P<0.0001$ \*\*\*\*. imBri2/mBri2 Ratio:  $F_{\text{interaction (1,20)}}=108.3$ ,  $P<0.0001$ ,  $F_{\text{treatment (1,20)}}=104.2$ ,  $P<0.0001$ ,  $F_{\text{genotype (1,20)}}=627.1$ ,  $P<0.0001$ , post-hoc Sidak's multiple comparisons test: *Itm2b<sup>w/w</sup>*: veh vs Chlor,  $P>0.9999$ , *Itm2b<sup>D/D</sup>*: veh vs Chlor,  $P<0.0001$ \*\*\*\*. No treatment: *Itm2b<sup>w/w</sup>* vs *Itm2b<sup>D/D</sup>*,  $P<0.0001$ \*\*\*\*, Chlor treatment: *Itm2b<sup>w/w</sup>* vs *Itm2b<sup>D/D</sup>*,  $P<0.0001$ \*\*\*\*.

1206  
1207  
1208  
1209  
1210  
1211  
1212  
1213  
1214  
1215  
1216  
1217  
1218  
1219  
1220  
1221  
1222  
1223  
1224  
1225  
1226  
1227

## Danish dementia and excitatory transmission

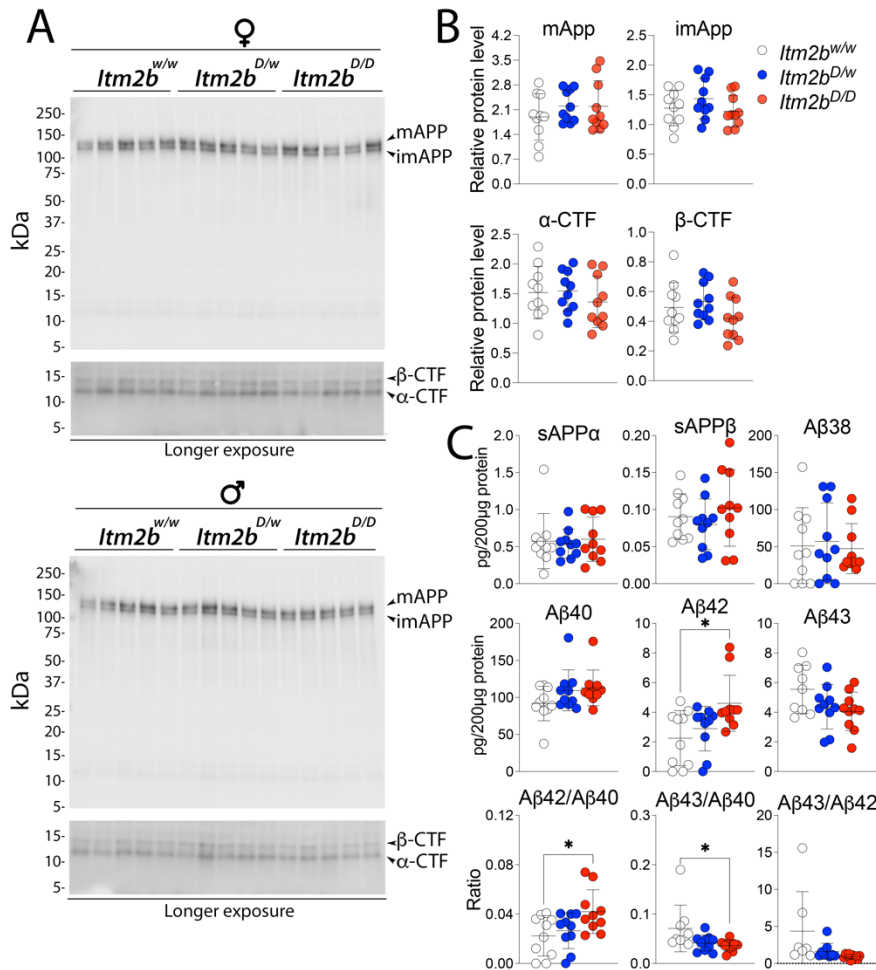

1228  
1229 **Figure 3. APP metabolite levels in *Itm2b<sup>D</sup>* KI rats.** Data are represented as mean ± SD and were  
1230 analyzed by ordinary one-way ANOVA followed by post-hoc Tukey's multiple comparisons test when  
1231 ANOVA showed statistically significant differences. We analyzed 8 weeks old rats, and 5 female and 5  
1232 male rats per genotype. (A) Levels of full-length APP, αCTF, and βCTF, were determined by Western  
1233 analysis of brain lysate of *Itm2b<sup>D/D</sup>*, *Itm2b<sup>D/w</sup>* and *Itm2b<sup>w/w</sup>* male and female rats. (B) Quantitation of  
1234 Western blots. Signal intensity of APP metabolites were normalized to red ponceau staining of  
1235 nitrocellulose membranes. ANOVA summary: mAPP,  $F_{(2,27)} = 0.7931$ ,  $P=0.4627$ ; imAPP,  $F_{(2,27)} = 1.367$ ,  
1236  $P=0.2720$ ; α-CTF,  $F_{(2,27)} = 0.6075$ ,  $P=0.5520$ ; β-CTF,  $F_{(2,27)} = 1.614$ ,  $P=0.2177$ ). (C) Levels of sAPPα,  
1237 sAPPβ, Aβ38, Aβ40, Aβ42 and Aβ43 were determined by ELISA of brain lysate from the same *Itm2b<sup>D/D</sup>*,  
1238 *Itm2b<sup>D/w</sup>* and *Itm2b<sup>w/w</sup>* male and female rats. [ANOVA summary: sAPPα,  $F_{(2,27)} = 0.1084$ ,  $P=0.8977$ ;  
1239 sAPPβ,  $F_{(2,27)} = 0.7666$ ,  $P=0.4744$ ; Aβ38,  $F_{(2,27)} = 0.1121$ ,  $P=0.8943$ ; Aβ40,  $F_{(2,27)} = 2.030$ ,  $P=0.1509$ ;  
1240 Aβ42,  $F_{(2,27)} = 4.764$ ,  $P=0.0169$  (post-hoc Tukey's multiple comparisons test: *Itm2b<sup>w/w</sup>* vs *Itm2b<sup>D/w</sup>*,  
1241  $P=0.6966$ , *Itm2b<sup>w/w</sup>* vs *Itm2b<sup>D/D</sup>*,  $P=0.0159^*$ ; *Itm2b<sup>D/w</sup>* vs *Itm2b<sup>D/D</sup>*,  $P=0.0948$ ); Aβ43,  $F_{(2,26)} = 2.654$ ,  
1242  $P=0.0893$ ; Aβ42/Aβ40,  $F_{(2,27)} = 4.074$ ,  $P=0.0284$  (post-hoc Tukey's multiple comparisons test: *Itm2b<sup>w/w</sup>* vs  
1243 *Itm2b<sup>D/w</sup>*,  $P=0.8326$ , *Itm2b<sup>w/w</sup>* vs *Itm2b<sup>D/D</sup>*,  $P=0.0301^*$ ; *Itm2b<sup>D/w</sup>* vs *Itm2b<sup>D/D</sup>*,  $P=0.1022$ ); Aβ43/Aβ40,  $F_{(2,26)}$   
1244  $= 4.031$ ,  $P=0.0299$  (post-hoc Tukey's multiple comparisons test: *Itm2b<sup>w/w</sup>* vs *Itm2b<sup>D/w</sup>*,  $P=0.0802$ , *Itm2b<sup>w/w</sup>*  
1245 vs *Itm2b<sup>D/D</sup>*,  $P=0.0347^*$ ; *Itm2b<sup>D/w</sup>* vs *Itm2b<sup>D/D</sup>*,  $P=0.9137$ ); Aβ43/Aβ42,  $F_{(2,26)} = 3.281$ ,  $P=0.0558$ ].  
1246  $P<0.05^*$ ;  $P<0.01^{**}$ ;  $P<0.001^{***}$ ;  $P<0.0001^{****}$ .  
1247



Danish dementia and excitatory transmission

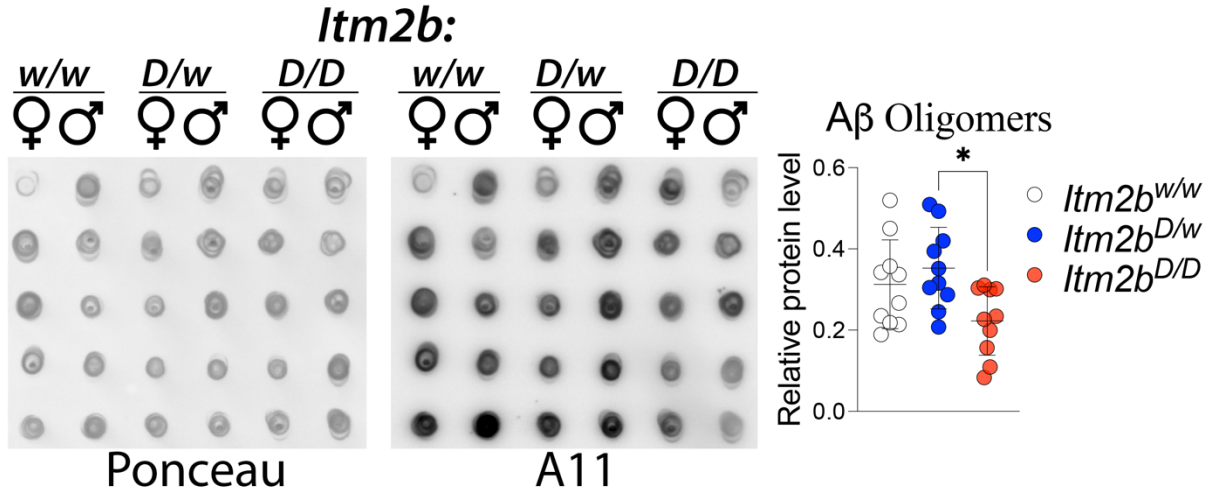

1248  
1249  
1250  
1251  
1252  
1253  
1254  
1255  
1256  
1257  
1258

**Figure 4. Levels of human A $\beta$  oligomeric species in the brain of peri-adolescent *Itm2b<sup>D/D</sup>*, *Itm2b<sup>D/w</sup>* and *Itm2b<sup>w/w</sup>* male and female rats. (A) We analyzed material from the same rats analyzed in Figure 3. Quantitation of dot-blot using the oligomer-specific antibody A11. Before immunoblot analysis, membranes were stained with Ponceau red. Quantitative analysis of A11 blot was normalized to the Ponceau red quantitative analysis. Data are represented as mean  $\pm$  SD and were analyzed by ordinary one-way ANOVA followed by post-hoc Tukey's multiple comparisons test when ANOVA showed statistically significant differences. ANOVA summary:  $F_{(2,27)} = 4.593$ ,  $P=0.0192^*$ ; post-hoc Tukey's multiple comparisons test: *Itm2b<sup>w/w</sup>* vs *Itm2b<sup>D/w</sup>*,  $P=0.6406$ , *Itm2b<sup>w/w</sup>* vs *Itm2b<sup>D/D</sup>*,  $P=0.1195$ ; *Itm2b<sup>D/w</sup>* vs *Itm2b<sup>D/D</sup>*,  $P=0.0170^*$ .**

## Danish dementia and excitatory transmission

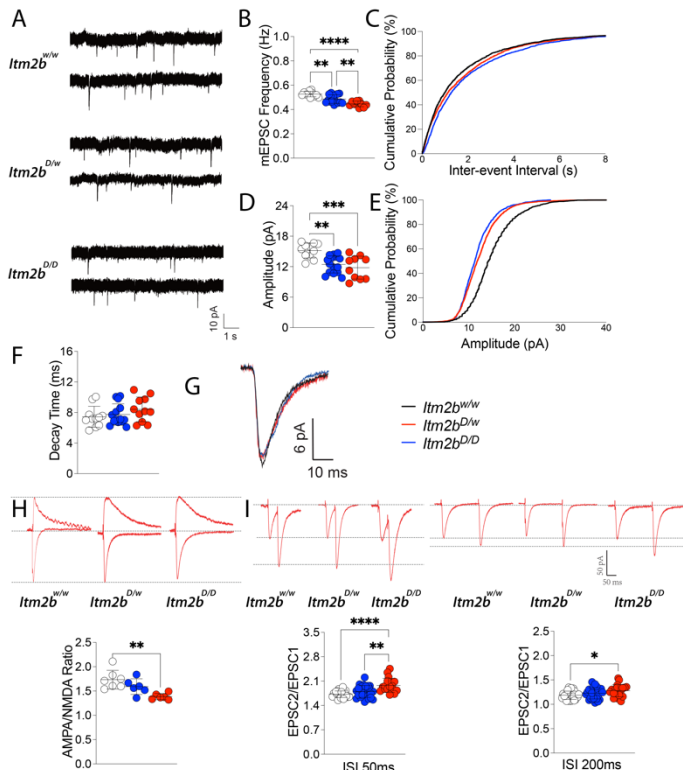

**Figure 5. Glutamatergic synaptic transmission is reduced at hippocampal SC-CA3>CA1 synapses of *Itm2b<sup>D</sup>* KI rats.** Data are represented as mean  $\pm$  SD and were analyzed by ordinary one-way ANOVA followed by post-hoc Tukey's multiple comparisons test when ANOVA showed significant differences. We used the following animals: *Itm2b<sup>w/w</sup>* N=11 (4M/6, 3F/5, indicating that 6 recordings were obtained from the 4 males and 5 recordings from the 3 females), *Itm2b<sup>D/w</sup>* N=15 (3M/7, 4F/8), *Itm2b<sup>D/D</sup>* N=10 (3M/5, 3F/5). (A) Representative recording traces of mEPSC at SC-CA3>CA1 synapses. (B) The Danish mutation causes a significant decrease in mEPSC frequency [ANOVA summary,  $F_{(2,33)} = 20.66$ ,  $P < 0.0001$ \*\*\*\*; post-hoc Tukey's multiple comparisons test: *Itm2b<sup>w/w</sup>* vs *Itm2b<sup>D/w</sup>*,  $P = 0.003$ \*\*\*, *Itm2b<sup>w/w</sup>* vs *Itm2b<sup>D/D</sup>*,  $P < 0.0001$ \*\*\*\*; *Itm2b<sup>D/w</sup>* vs *Itm2b<sup>D/D</sup>*,  $P = 0.0051$ \*\*]. (C) Cumulative probability of AMPAR-mediated mEPSC frequency inter event intervals. (D) [ANOVA summary,  $F_{(2,33)} = 10.78$ ,  $P = 0.0002$ \*\*\*; post-hoc Tukey's multiple comparisons test: *Itm2b<sup>w/w</sup>* vs *Itm2b<sup>D/w</sup>*,  $P = 0.0016$ \*\*\*, *Itm2b<sup>w/w</sup>* vs *Itm2b<sup>D/D</sup>*,  $P = 0.0005$ \*\*\*\*; *Itm2b<sup>D/w</sup>* vs *Itm2b<sup>D/D</sup>*,  $P = 0.6691$ ]. (E) Cumulative probability of AMPAR-mediated mEPSC amplitude. (F) In contrast, decay time of mEPSC was not significantly changed [ANOVA summary,  $F_{(2,33)} = 1.292$ ,  $P = 0.2882$ ]. (G) Average mEPSC of *Itm2b<sup>D/D</sup>*, *Itm2b<sup>D/w</sup>* and *Itm2b<sup>w/w</sup>* rats. (H) AMPA/NMDA ratio is significantly decreased in *Itm2b<sup>D/D</sup>* rats [ANOVA summary,  $F_{(2,16)} = 8.417$ ,  $P = 0.0032$ \*\*; post-hoc Tukey's multiple comparisons test: *Itm2b<sup>w/w</sup>* vs *Itm2b<sup>D/w</sup>*,  $P = 0.2393$ ; *Itm2b<sup>w/w</sup>* vs *Itm2b<sup>D/D</sup>*,  $P = 0.0023$ \*\*\*, *Itm2b<sup>D/w</sup>* vs *Itm2b<sup>D/D</sup>*,  $P = 0.0818$ ]. Representative traces are shown on top of the graph (traces are averaged from 20 sweeps). Animals used: *Itm2b<sup>w/w</sup>* N=7 (4M/4, 3F/3), *Itm2b<sup>D/w</sup>* N=6 (3M/3, 3F/3), *Itm2b<sup>D/D</sup>* N=6 (3M/3, 3F/3). (I) Average PPF at 50ms (left panel) and 200ms (right panel) Inter stimulus Interval (ISI) shows that PPF is increased in *Itm2b<sup>D/D</sup>* rats ISI [50ms ISI PPF ANOVA summary:  $F_{(2,60)} = 11.89$ ,  $P < 0.0001$ \*\*\*\*; post-hoc Tukey's multiple comparisons test: *Itm2b<sup>w/w</sup>* vs *Itm2b<sup>D/w</sup>*,  $P = 0.2315$ ; *Itm2b<sup>w/w</sup>* vs *Itm2b<sup>D/D</sup>*,  $P < 0.0001$ \*\*\*\*; *Itm2b<sup>D/w</sup>* vs *Itm2b<sup>D/D</sup>*,  $P = 0.0031$ \*\*]. 200ms ISI PPF ANOVA summary:  $F_{(2,64)} = 3.802$ ,  $P = 0.0275$ \*; post-hoc Tukey's multiple comparisons test: *Itm2b<sup>w/w</sup>* vs *Itm2b<sup>D/w</sup>*,  $P = 0.4504$ ; *Itm2b<sup>w/w</sup>* vs *Itm2b<sup>D/D</sup>*,  $P = 0.0205$ \*; *Itm2b<sup>D/w</sup>* vs *Itm2b<sup>D/D</sup>*,  $P = 0.2462$ ]. Representative traces are shown on top of the panels.  $P < 0.05$ \*;  $P < 0.01$ \*\*;  $P < 0.001$ \*\*\*;  $P < 0.0001$ \*\*\*\*. Animals used: *Itm2b<sup>w/w</sup>* N=18 (4M/10, 3F/8), *Itm2b<sup>D/w</sup>* N=20 (3M/10, 4F/10), *Itm2b<sup>D/D</sup>* N=17 (3M/8, 3F/9).

1259  
1260  
1261  
1262  
1263  
1264  
1265  
1266  
1267  
1268  
1269  
1270  
1271  
1272  
1273  
1274  
1275  
1276  
1277  
1278  
1279  
1280  
1281  
1282  
1283  
1284  
1285  
1286
